# Supplementary material for: Acquisition of Streptomycin Resistance by Oxidative Stress Induced by Hydrogen Peroxide in Radiation-Resistant Bacterium Deinococcus geothermalis
Source: MDPI journal article supplement (doi:10.3390/ijms23179764), 2022-08-28

## Supplementary data

**Table S1.** List of used primer sequences.

| Primer                                  | Sequence (5' > 3')                | Gene              |
|-----------------------------------------|-----------------------------------|-------------------|
| Construction of mutants                 |                                   |                   |
| 0257_LF_KpnI                            | AAGGTACCTATCGCCATAAGCTCTAA        | <i>dps3</i>       |
| 0257_LR_Sall                            | AAGTCGACGCTCCAATTGTGGATTAA        | <i>dps3</i>       |
| 0257_RF_XbaI                            | AATCTAGAAAGAAGCTCCTTGACGTCGT      | <i>dps3</i>       |
| 0257_RR_PstI                            | AACTGCAGGGTTTTGGAACTGCTTTA        | <i>dps3</i>       |
| 0281_LF_BamHI                           | AAGGATCCAATCAGGATCACATTGAGTC      | <i>dps1</i>       |
| 0281_LR_BglII                           | AAAGATCTGACTTTCTTCACGCTTGCG       | <i>dps1</i>       |
| 0281_RF_KpnI                            | AAGGTACCATGAACTGAGCGGGG           | <i>dps1</i>       |
| 0281_RR_Sall                            | AAGTCGACGCTTTCATAGCAAACC          | <i>dps1</i>       |
| 2840_LF_KpnI                            | AAG GTA CCC GGG TGA ACA TCA GAT   | <i>lysR</i>       |
| 2840_LR_Sall                            | AAG TCG ACC AGA ATC AAT TCG TCC T | <i>lysR</i>       |
| 2840_RF_XbaI                            | AAT CTA GAC TAC AGA CGA GAA CGG T | <i>lysR</i>       |
| 2840_RR_PstI                            | AAC TGC AGG TCT TAA GCC TCG GA    | <i>lysR</i>       |
| To check for streptomycin related genes |                                   |                   |
| Dgeo_2335_F                             | TGATGGCGGTGGTTGTCTT               | <i>rsmG</i>       |
| Dgeo_2335_R                             | ATTTTCAGTGGATGGCGCG               | <i>rsmG</i>       |
| Dgeo_1873_F                             | GAACACCTTCAGCGGCTCTT              | <i>rpsL</i>       |
| Dgeo_1873_R                             | CCCTCCGGCATCCTTGC                 | <i>rpsL</i>       |
| Dgeo_0447_F                             | AGGGTCACTTTCCTGGTCTGT             | <i>mthA</i>       |
| Dgeo_0447_R                             | GGCGAGCCACTGGTTGGAA               | <i>mthA</i>       |
| Dgeo_0776_F                             | GACCCATCCCGACCACTGA               | <i>mthA</i>       |
| Dgeo_0776_R                             | GCAGGCCTGGTCCTTCACA               | <i>mthA</i>       |
| Dgeo_0534_F                             | AGGTGATATTGCGAGTGCCT              | <i>znuA</i>       |
| Dgeo_0534_R                             | AGACGATGGTGGTGAACGC               | <i>znuA</i>       |
| Dgeo_0915_F                             | CATGAGTGACAACATCGGCG              | <i>nuoG</i>       |
| Dgeo_0915_R                             | TGTACGCAAAGGTCGTCAGC              | <i>nuoG</i>       |
| Dgeo_1583_F                             | CGGAGCGTACTTTGAGTGG               | <i>trkH</i>       |
| Dgeo_1583_R                             | CATCTCATAGAGGGTGGTCG              | <i>trkH</i>       |
| 16S_rRNA_F1                             | GCGCAAGCTTGGATTAAACG              | <i>dgeo_R0002</i> |
| 16S_rRNA_R1                             | CAGCTCCCAAAGCGCACA                | <i>dgeo_R0002</i> |
| 16S_rRNA_F2                             | GACAGGGTGGTACACGCG                | <i>dgeo_R0008</i> |
| 16S_rRNA_R2                             | GCGGGAAATGCAGCAAGATG              | <i>dgeo_R0008</i> |
| 16S_rRNA_F3                             | GATCATTGTGCTGGGGGAC               | <i>dgeo_R0013</i> |
| 16S_rRNA_R                              | GGCGCAAGTGACGATGACA               | <i>dgeo_R0013</i> |
| 16S_rRNA_F4                             | GAAGCAAAGGGCCACCTGA               | <i>dgeo_R0067</i> |
| 16S_rRNA_R4                             | CGGTGTGTGTACCCGTCT                | <i>dgeo_R0067</i> |
| Dgeo_1841_F                             | TGGGATTCCCGATGGTGAC               | <i>rpsD</i>       |

|                            |                       |             |
|----------------------------|-----------------------|-------------|
| Dgeo_1841_R                | AGAAGAAGTTCCGCGCCTAAA | <i>rpsD</i> |
| Quantitative Real Time PCR |                       |             |
| Dgeo_1202_F                | AGCTCGGTGCGGTAGGTAAA  | <i>aadA</i> |
| Dgeo_1202_R                | CGTTCGGGTATCTCGAGGG   | <i>aadA</i> |
| Dgeo_0646_F                | TGAAGGTAATCGCTGCCGT   | EF-Tu       |
| Dgeo_0646_R                | GCAAAAGGAACGTTTGAGCG  | EF-Tu       |
| Dgeo_1869_F                | GTGAAGGTAATCGCTGCTGT  | EF-Tu       |
| Dgeo_1869_R                | CAAAAGGAACGTTTGAGCGGA | EF-Tu       |

---

## Figure legends

**Figure. S1.** Comparison of growth pattern among wild-type,  $\Delta dgeo\_0257$ , and  $\Delta dgeo\_0281$  parent and Sm-resistant mutants in antibiotics-free TGY medium (A) and TGY+Sm 50  $\mu\text{g/mL}$  medium (B).

**Figure. S2.** Amino acid alignment of RpsL (ribosomal protein S12) among *E. coli*, *D. geothermalis*, and *T. thermophilus* (A). Two streptomycin interacting regions were marked red color such as P42, K43, K44, and P45, and K88 and 91P amino acid residues. Scheme indicates streptomycin interacting region using Mol\* viewer (Sehna *et al.*, 2021) in 30S small ribosomal subunit from PDB 4DV7 (B). The decoding center region composed of ribosomal proteins S12, S4, and helices h18, h27, and h44 of 16S rRNA. Light green indicates the streptomycin interacting surface.

**Figure. S3.** PCR detection of additional Sm-resistant related genes such as *znuA* (*dgeo\_0534*), *nuoG* (*dgeo\_0915*), *trkH* (*dgeo\_1583*) and *dgeo\_1841* for ribosomal protein S4. Lanes: M, size marker; 1, wild-type; 2-5, WT S1-S4; 6,  $\Delta dgeo\_0257$  S1; 7-9,  $\Delta dgeo\_2840$  S1, S2, and *SrsmG*; 10,  $\Delta dgeo\_0281$  S1.

**Figure. S4.** PCR detection of four 16S rRNAs. Lanes: M, size marker; 1-4, wild-type S1-S4; 5  $\Delta dgeo\_0257$  S1; 6-8,  $\Delta dgeo\_2840$  S1, S2, and *SrsmG*; 9,  $\Delta dgeo\_0281$  S1.

**Figure. S5.** Differential antibiotics-resistant phenotypes from complement strain. Streptomycin-resistant MIC levels among wild-type,  $\Delta dgeo\_2840$ , and a complement (C2840) (A). Nine streptomycin-resistant mutants from the complement strains (C2840) exhibit different streptomycin MIC values following K43R, K88R, K88E, and P91H comparing with parent strains (B).

**Figure. S6.** Phenotypic recovery of cell growth in complement strain. Both  $\Delta dgeo\_2840/\text{pRADgro}$  and  $\Delta dgeo\_2840/\text{pRADgro}::dgeo\_2840$  were grown on TGY medium containing 3  $\mu\text{g/mL}$  of chloramphenicol.

**Figure. S7.** Phenotypic recovery of hydrogen peroxide sensitivity in complement strain. Wild-type,  $\Delta dgeo\_2840$ , and a complement (C2840) strains were cultivated till  $\text{OD}_{600}$  2.0, then exposed 80-120 mM hydrogen peroxide of final concentration for one hour. Then the diluted samples were spotted on TGY agar plates and incubated for 2 days at 48 °C.

A

## Growth curve

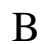

### Growth curve

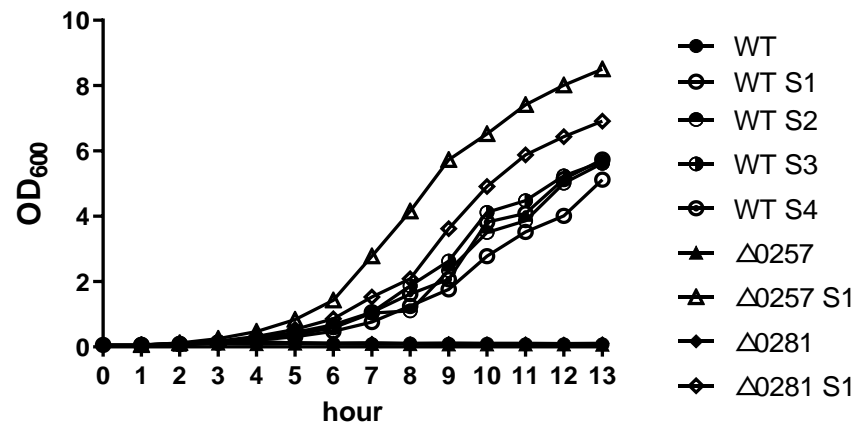

Figure. S2A

|       |                                                      |         |            |
|-------|------------------------------------------------------|---------|------------|
|       | 1                                                    | 43      | 60         |
| Dgeo  | MPTTQQLLRKGR                                         | TTLQKKS | KVPAL      |
| Tth   | MPTINQLVRKGR                                         | EKVRKKS | KVPAL      |
| Ecoli | MATVNQLVRKPR                                         | ARKVAKS | NPAL       |
|       | *.* :*:** * **:*****:..* :***** * *.*****:..*:**:*.* |         |            |
|       | 61                                                   | 88 91   | 120        |
| Dgeo  | FEVTAYIPGEGH                                         | NLQEH   | SVVLIRGGRV |
| Tth   | YEVTAYIPGEGH                                         | NLQEH   | SVVLIRGGRV |
| Ecoli | FEVTSYIGGEGH                                         | NLQEH   | SVILIRGGRV |
|       | :***:** *****:***** ***** * *****:.:*****.*          |         |            |
|       | 121                                                  | 134     |            |
| Dgeo  | KPKAGAAA                                             | AAGAKKK |            |
| Tth   | KPKEAAK                                              | TAAKK-  |            |
| Ecoli | RPKA-                                                | -----   |            |
|       | : **                                                 |         |            |

Figure. S2B

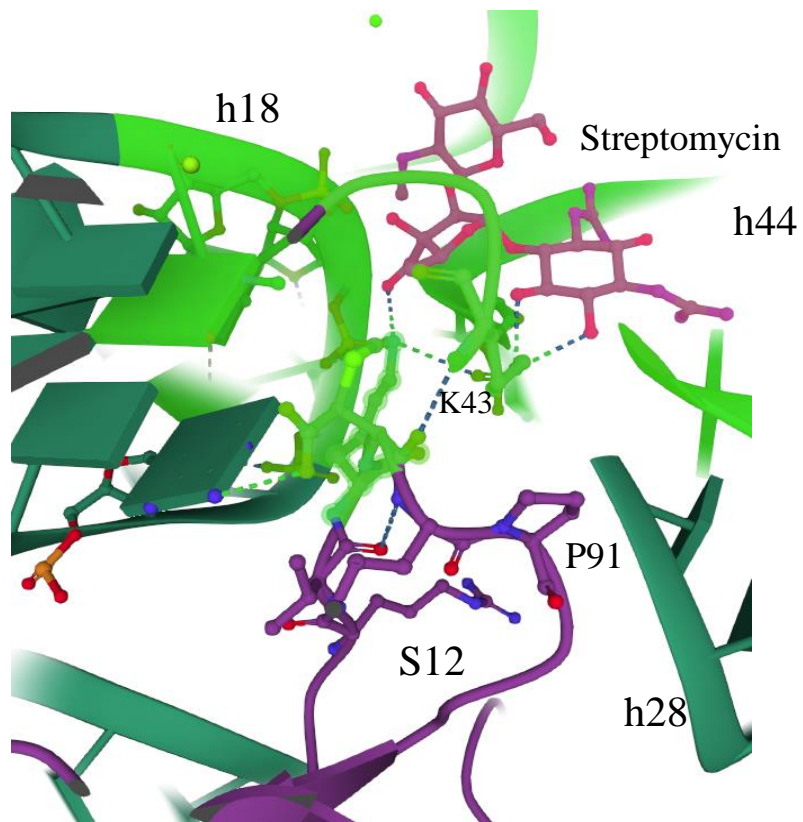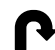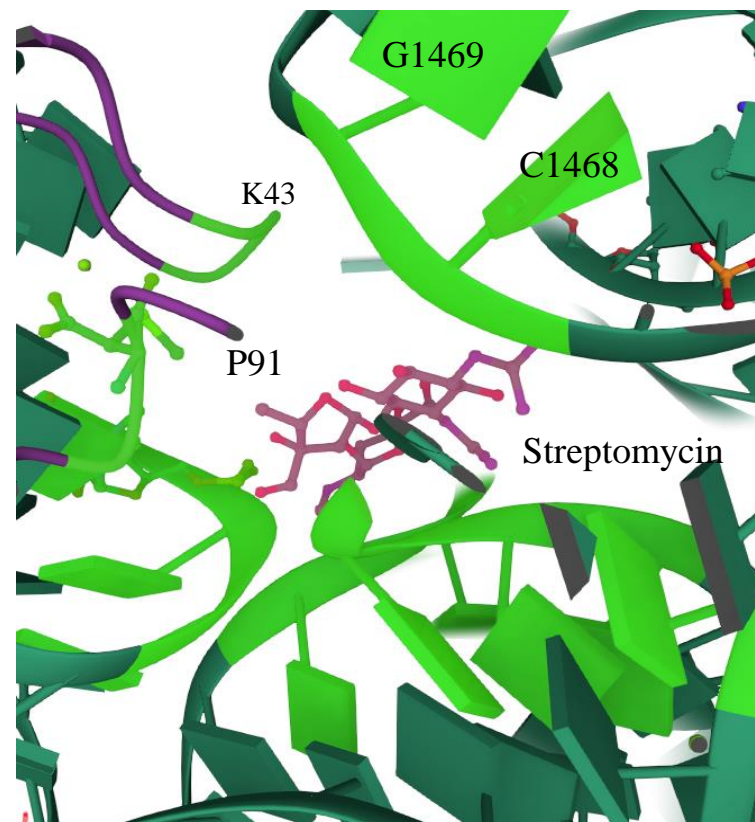

Resource : PDB 4DV7 (*T. thermophilus* 30S subunit)

Figure. S3

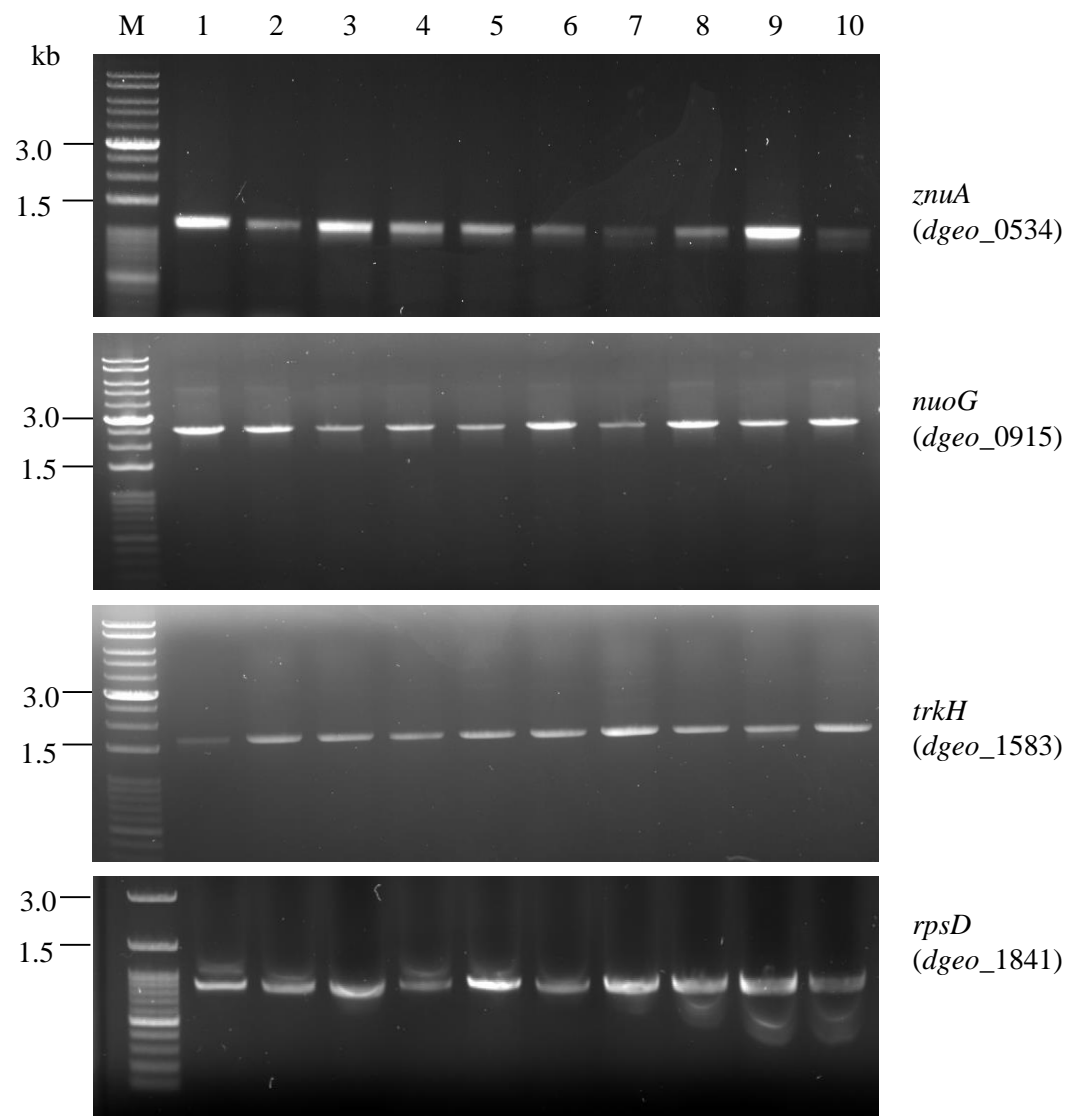

Figure. S4

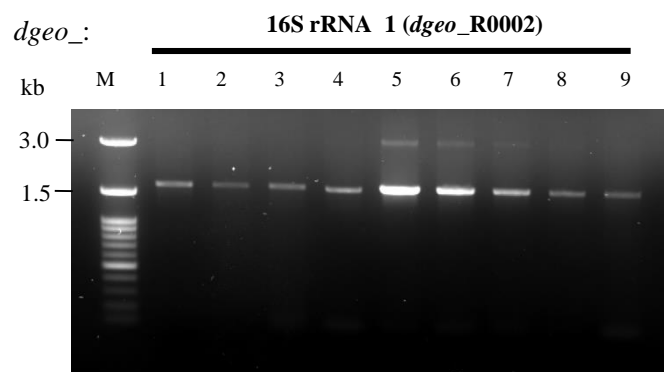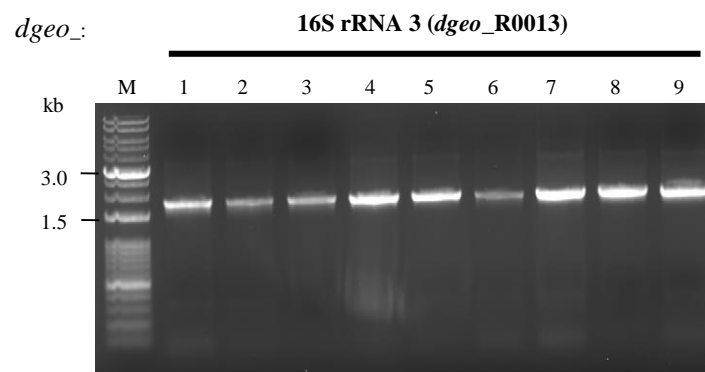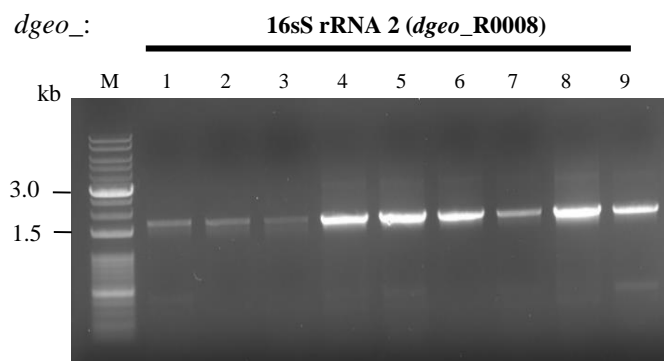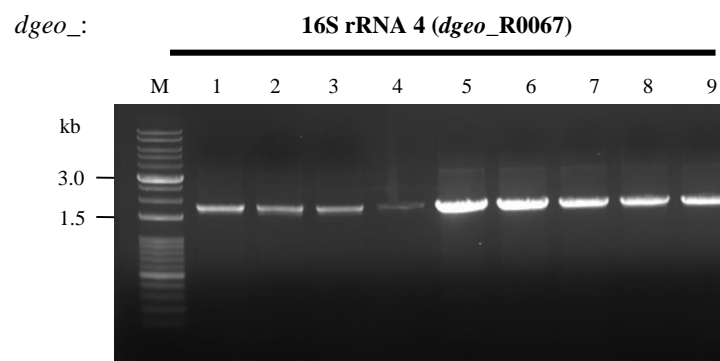



Figure. S5  
A

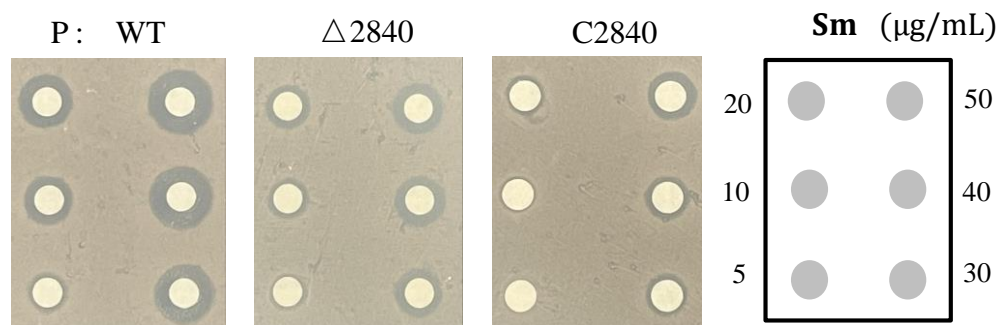

B

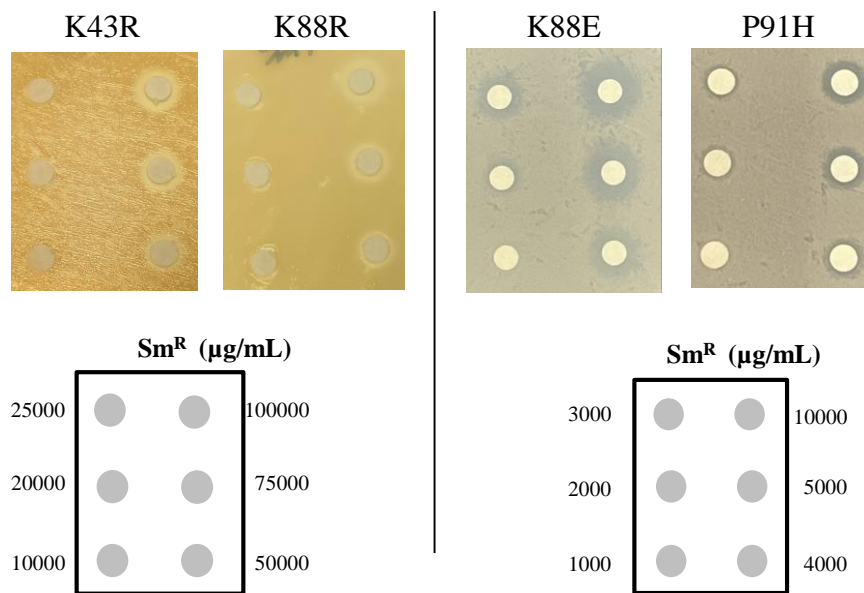

Figure. S6

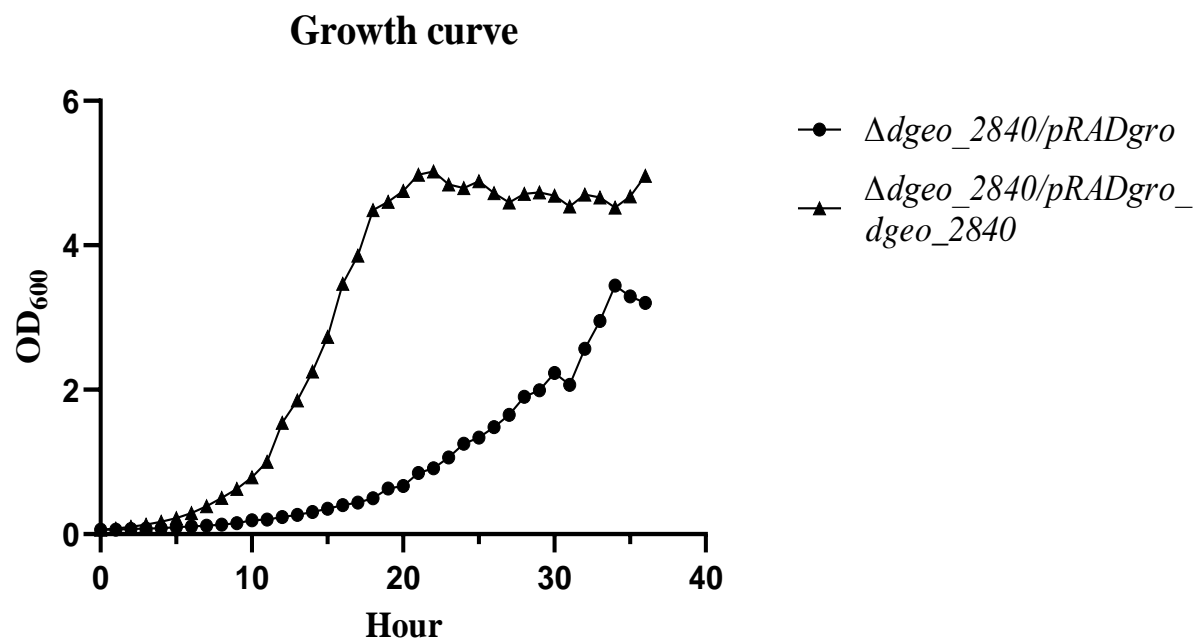

Figure. S7

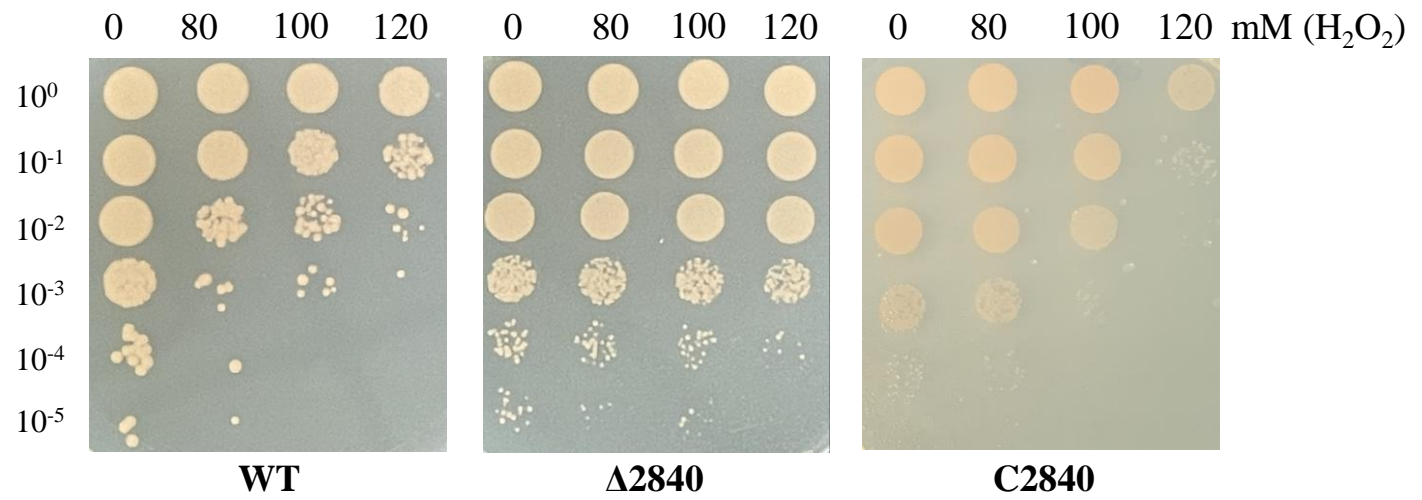

Supplement: s1 [file s1]
